# Supplementary material for: CXCR7 attenuates the TGF-β-induced endothelial-to-mesenchymal transition and pulmonary fibrosis
Source: Royal Society of Chemistry journal article supplement (doi:10.1039/c7mb00247e), 2017-08-10
Supplement: c7mb00247e1.pdf [file c7mb00247e1.pdf]

**Supporting Figure S1. CXCR7 overexpression inhibits Jag1 expression of Notch pathway**

*in vivo*

QPCR analysis in left lungs of mice treated with CXCR7. n = 7/group. \* $p < 0.05$ .
