# Supplementary figures and images for: CXCR7 attenuates the TGF-β-induced endothelial-to-mesenchymal transition and pulmonary fibrosis
Source: Royal Society of Chemistry journal article supplement (doi:10.1039/c7mb00247e), 2017-08-10

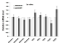

Supplement: c7mb00247e2.pdf [file c7mb00247e2.pdf]
